# Supplementary material for: Elucidating the Ability of CGRP to Modulate Microvascular Events in Mouse Skin
Source: MDPI journal article supplement (doi:10.3390/ijms232012246), 2022-10-13
Supplement: s1 [file s1]

Supplementary figure S1

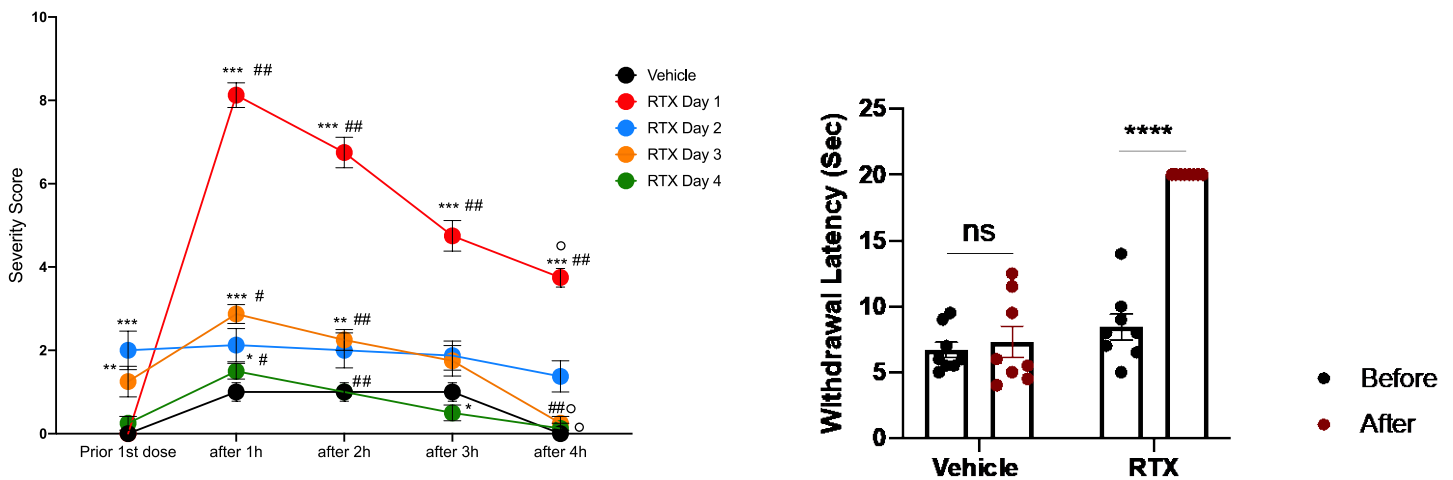

### Supplementary Figure S1. The effect of the sensory nerve depleting agent RTX.

The figure shows (a) severity scoring by observation for 4 h after vehicle (10 % Tween-80, 10 % ethanol, 80 % saline) or RTX (0.3 mg/kg s.c.) on each of the 4 days. The parameters for the severity scoring include appearance, natural behaviour and provoked behaviour. All parameters were scored from zero to three with zero being a normal response and three being a severe response. Results are shown as mean  $\pm$  SEM (n=8). Two-way ANOVA with Bonferroni's post hoc test.  $p^* < 0.05$ ,  $p^{**} < 0.01$  and  $p^{***} < 0.001$  are compared to vehicle's respective timepoint.  $p^{\#} < 0.05$  and  $p^{\#\#} < 0.01$  are compared to respective baseline.  $o = p < 0.0001$  is compared to 'RTX after 1h' timepoint. (b) shows withdrawal latency (nociceptive behaviour) from a hot plate (55°C). A cut off time of 20 sec was used, for those that showed no response. Results are shown as mean  $\pm$  SEM (n=8). Two-way ANOVA followed by Bonferroni's post hoc test.  $p^{****} < 0.0001$  is compared to before RTX treatment.

## Supplementary figure S2

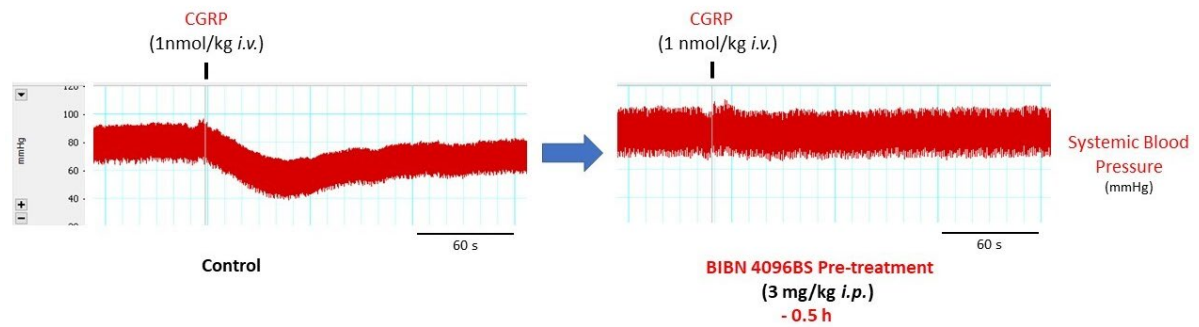

### Supplementary Figure S2. BIBN4096 Blockade of CGRP hypotensive effect after carotid artery cannulation.

(a) Blood pressure (mmHg) measured via carotid artery cannulation in a single anaesthetized mouse following CGRP (1 nmol/kg i.v.). (b) Systemic blood pressure (mmHg) measured in the carotid artery following CGRP 1 nmol/kg i.v.) in a mouse pre-treated with BIBN4096 (3 mg/kg i.p.) 30 min beforehand.

Supplementary figure S3

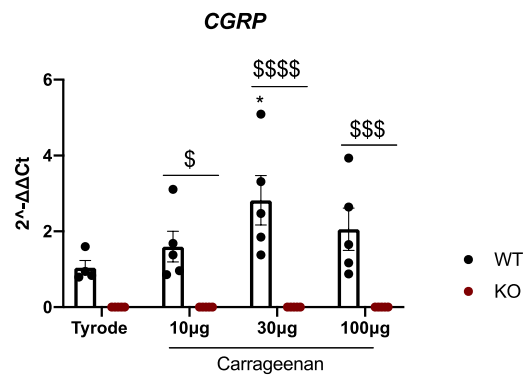

**Supplementary Figure S3. CGRP mRNA expression (DRGs) after carrageenan treatment (i.d.) over 4 h (WT vs  $\alpha$ CGRP KO mice).**

CGRP gene expression in DRGs samples collected 4 h after Tyrode and Carrageenan (10μg, 30μg and 100μg) were injected i.d. in WT and  $\alpha$ CGRP KO mouse dorsal skin. Results are shown as mean  $\pm$  SEM (n= 4-5). Two-Way ANOVA followed by Bonferroni's post hoc test.  $p^* < 0.05$  is compared to Tyrode.  $p^s < 0.05$ ,  $p^{sss} < 0.001$  and  $p^{ssss} < 0.0001$  are compared to WT Carrageenan.
